# Supplementary material for: Comparison of Oropharyngeal Microbiota from Children with Asthma and Cystic Fibrosis
Source: PubMed Central journal article supplement (PMC5763206; doi:10.1155/2017/5047403), 2017-12-27
Supplement: 5047403.f1.pdf [file 5047403.f1.pdf]

513 **Supplementary Figure 1:** PMA treatment of the DNA did neither influence diversity nor  
514 biomass of the CF microbiome in the analyzed cohort.

515 A subset of samples (n=10) from the CF cohort was analyzed for changes in diversity and  
516 global biomass with and without PMA treatment. No significant differences were observed.

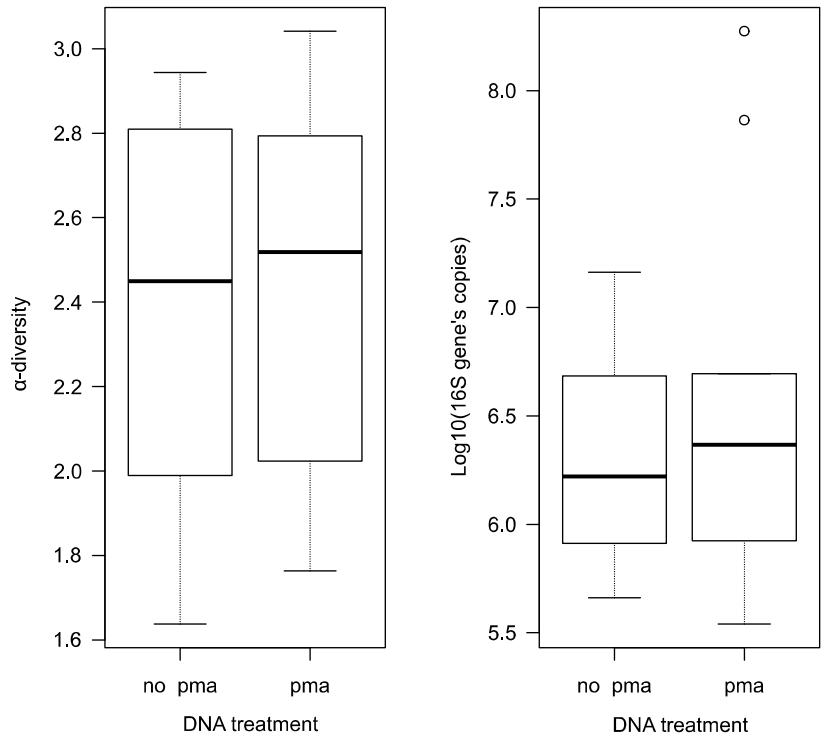

517

518

519 **Supplementary Figure 2:** PMA treatment of the DNA did not influence the structure of the  
520 CF microbiome in the analyzed cohort.

521 A subset of samples (n=10) from the CF cohort was analyzed for changes in the microbial  
522 structure with and without PMA treatment. No significant differences in the structure of the  
523 microbiome were observed. Paired samples are in the same color. The ellipses represent the  
524 95% confidence interval assuming assuming a multivariate t-distribution (full lines) or a  
525 multivariate normal distribution (dashed lines).

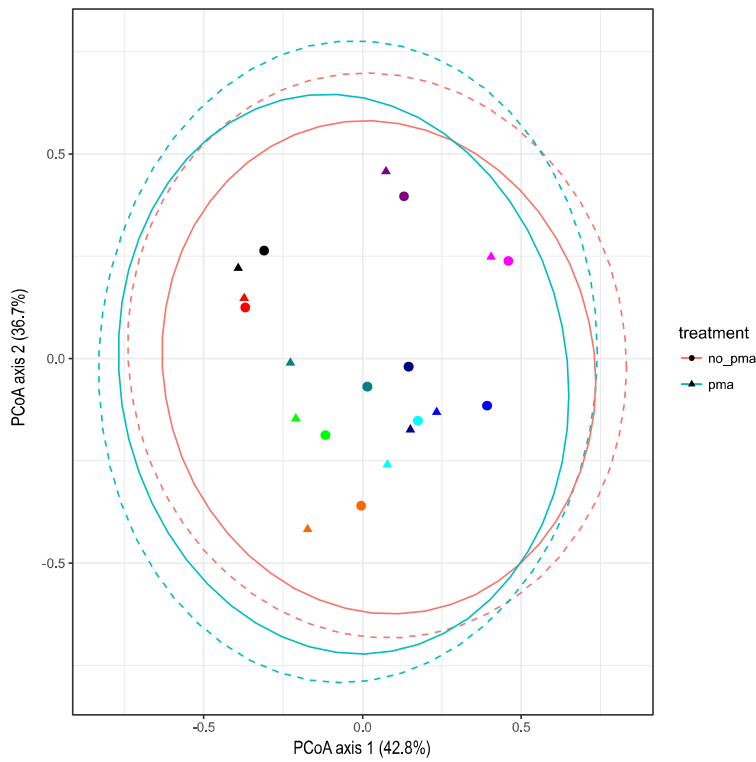

526

527

528 **Supplementary Figure 3:** *Impact of antibiotic therapy prior of sampling on the diversity and*  
529 *biomass of the microbiome in the analyzed cohort.*

530 Samples were classified in two groups 'treated' and 'non treated' based on the usage of  
531 antibiotic within 4 weeks prior to sampling. Statistical significance was calculated by pairwise  
532 Wilcoxon test. P-value code: \*\*\*<0.001.

533

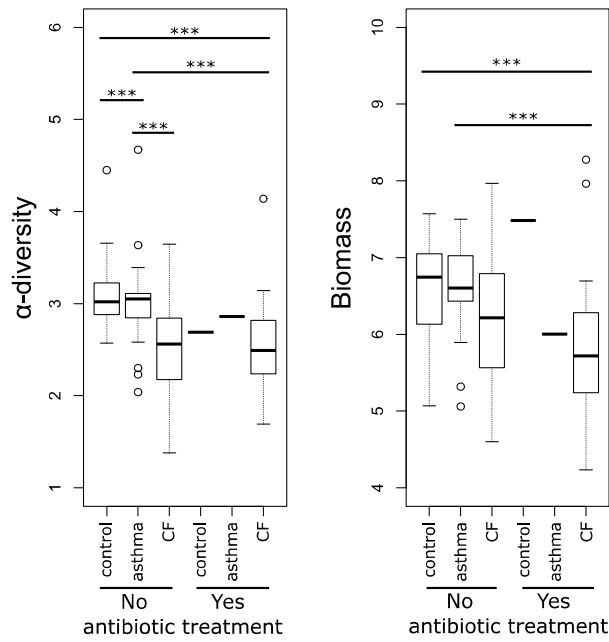

534
